# Supplementary material for: Genome Analysis of Acinetobacter lwoffii Strains Isolated from Permafrost Soils Aged from 15 Thousand to 1.8 Million Years Revealed Their Close Relationships with Present-Day Environmental and Clinical Isolates
Source: MDPI journal article supplement (doi:10.3390/biology10090871), 2021-09-04
Supplement: s1 [file s1]

**Supplementary Table S6.** Composite transposons in the genomes of *A. lwoffii*.

1) Strain ED23-35

Size of composite transposon: 8163 bp

| Description                                | Coordinates |         | Orientation |
|--------------------------------------------|-------------|---------|-------------|
|                                            | start       | stop    |             |
| ISAbal4                                    | 2660338     | 2661619 | >           |
| Rep_3. Plasmid replication. RepB (partial) | 2661982     | 2661590 | <           |
| hypothetical protein                       | 2662787     | 2663095 | >           |
| hypothetical protein                       | 2663715     | 2663245 | <           |
| hypothetical protein                       | 2664335     | 2663865 | <           |
| MobA                                       | 2665285     | 2664332 | <           |
| hypothetical protein                       | 2665500     | 2665285 | <           |
| MobC                                       | 2665694     | 2665963 | >           |
| hypothetical protein                       | 2666546     | 2665974 | <           |
| Rep_3. Plasmid replication. RepB (partial) | 2667026     | 2666634 | <           |
| ISAbal4                                    | 2667219     | 2668500 | >           |

2) Strain ED23-35

Size of composite transposon: 10174 bp

| Description                                                           | Coordinates |         | Orientation |
|-----------------------------------------------------------------------|-------------|---------|-------------|
|                                                                       | start       | stop    |             |
| ISAbal1                                                               | 3087317     | 3088417 | >           |
| Uncharacterized sodium-dependent transporter YocS                     | 3089441     | 3088494 | <           |
| Nicotinamidase (EC 3.5.1.19)                                          | 3090199     | 3089570 | <           |
| 4-hydroxybenzoate transporter                                         | 3091713     | 3090508 | <           |
| 4-hydroxy-tetrahydrodipicolinate synthase (EC 4.3.3.7)                | 3092438     | 3093337 | >           |
| putative lipoprotein-34 precursor (NlpB)                              | 3093352     | 3093957 | >           |
| Phosphoribosylaminoimidazole-succinocarboxamide synthase (EC 6.3.2.6) | 3093995     | 3094714 | >           |
| Replication-associated recombination protein RarA                     | 3096292     | 3095024 | <           |
| ISAbal1                                                               | 3096387     | 3097487 | >           |

3) Strain ED45-23

Size of composite transposon: 3410 bp

| Description                                           | Coordinates |         | Orientation |
|-------------------------------------------------------|-------------|---------|-------------|
|                                                       | start       | stop    |             |
| ISAbal1                                               | 2471751     | 2472930 | <           |
| 4-hydroxybenzoate polyprenyltransferase (EC 2.5.1.39) | 2472965     | 2473843 | >           |
| ISAbal1                                               | 2473981     | 2475160 | <           |

Note that identical composite transposon is present in *Acinetobacter baumannii* EH

#### 4) Strain ED45-23

Size of composite transposon: 8243bp.

| Description                                                                    | Coordinates |         | Orientation |
|--------------------------------------------------------------------------------|-------------|---------|-------------|
|                                                                                | start       | stop    |             |
| ISAbal25                                                                       | 2470396     | 2471482 | >           |
| ISAbal                                                                         | 2471751     | 2472930 | <           |
| 4-hydroxybenzoate polyprenyltransferase (EC 2.5.1.39)                          | 2472965     | 2473843 | >           |
| ISAbal                                                                         | 2473981     | 2475160 | <           |
| Alkyl sulfatase and related hydrolases, MBL-fold metallo-hydrolase superfamily | 2477207     | 2475252 | <           |
| <a href="#">ΔISAlw27</a>                                                       | 2477228     | 2477519 | >           |
| ISAbal25                                                                       | 2477552     | 2478638 | >           |

#### 5) Strain ED45-23

Size of composite transposon: 10959 bp

| Description                                                                      | Coordinates |         | Orientation |
|----------------------------------------------------------------------------------|-------------|---------|-------------|
|                                                                                  | start       | stop    |             |
| ISAlw9                                                                           | 1325268     | 1326659 | <           |
| 16S rRNA (cytosine(1402)-N(4))-methyltransferase (EC 2.1.1.199)                  | 1326811     | 1327722 | >           |
| Cell division protein FtsL                                                       | 1327733     | 1328065 | >           |
| Cell division protein FtsI [Peptidoglycan synthetase] (EC 2.4.1.129)             | 1328081     | 1329904 | >           |
| UDP-N-acetylmuramoylalanyl-D-glutamate--2,6-diaminopimelate ligase (EC 6.3.2.13) | 1329916     | 1331412 | >           |
| UDP-N-acetylmuramoyl-tripeptide--D-alanyl-D-alanine ligase (EC 6.3.2.10)         | 1331422     | 1332825 | >           |
| Phospho-N-acetylmuramoyl-pentapeptide-transferase (EC 2.7.8.13)                  | 1332826     | 1333944 | >           |
| Ribosomal RNA large subunit methyltransferase A (EC 2.1.1.51)                    | 1333999     | 1334802 | >           |
| ISAlw9                                                                           | 1334835     | 1336226 | <           |

Note that similar composite transposon (90% nucleotide sequence identity) is present in *Acinetobacter lwoffii* strain FDAARGOS 1393.

#### 6) Strain ED45-23

Size of composite transposon: 2618 bp

| Description                              | Coordinates |         | Orientation |
|------------------------------------------|-------------|---------|-------------|
|                                          | start       | stop    |             |
| ISAbal25                                 | 2634122     | 2635208 | <           |
| type III restriction enzyme, res subunit | 2635283     | 2635669 | >           |
| ISAbal25                                 | 2635653     | 2636739 | <           |

### 7) Strain VS15

Size of composite transposon: 2618 bp.

Two identical copies located in the chromosome and in plasmid pALWVS1.4.

| Description                                       | Coordinates |         | Orientation |
|---------------------------------------------------|-------------|---------|-------------|
|                                                   | start       | stop    |             |
| ISAbal                                            | 1976802     | 1977981 | <           |
| Multidrug resistance transporter, Bcr/CflA family | 1979256     | 1978060 | <           |
| ISAbal                                            | 1980072     | 1981251 | <           |

### 8) Strain VS15

Size of composite transposon: 10956 bp

| Description                                                                      | Coordinates |         | Orientation |
|----------------------------------------------------------------------------------|-------------|---------|-------------|
|                                                                                  | start       | stop    |             |
| ISAlw10                                                                          | 1080659     | 1082047 | <           |
| Ribosomal RNA large subunit methyltransferase A (EC 2.1.1.51)                    | 1082882     | 1082079 | <           |
| Phospho-N-acetylmuramoyl-pentapeptide-transferase (EC 2.7.8.13)                  | 1084055     | 1082937 | <           |
| UDP-N-acetylmuramoyl-tripeptide--D-alanyl-D-alanine ligase (EC 6.3.2.10)         | 1085459     | 1084056 | <           |
| UDP-N-acetylmuramoylalanyl-D-glutamate--2,6-diaminopimelate ligase (EC 6.3.2.13) | 1086970     | 1085474 | <           |
| Cell division protein FtsI [Peptidoglycan synthetase] (EC 2.4.1.129)             | 1088805     | 1086982 | <           |
| Cell division protein FtsL                                                       | 1089153     | 1088821 | <           |
| 16S rRNA (cytosine(1402)-N(4))-methyltransferase (EC 2.1.1.199)                  | 1090075     | 1089164 | <           |
| ISAlw10                                                                          | 1090226     | 1091614 | <           |

### 9) Strain EK30A

Size of composite transposon: 3524 bp.

| Description          | Coordinates |        | Orientation |
|----------------------|-------------|--------|-------------|
|                      | start       | stop   |             |
| ISAlw5               | 367311      | 368619 | <           |
| hypothetical protein | 368644      | 369528 | >           |
| ISAlw5               | 369526      | 370834 | <           |

### 10) Strain EK30A

Size of composite transposon: 10861 bp.

| Description                                     | Coordinates |         | Orientation |
|-------------------------------------------------|-------------|---------|-------------|
|                                                 | start       | stop    |             |
| ISAbal                                          | 2870992     | 2872171 | >           |
| hypothetical protein                            | 2872712     | 2873182 | >           |
| hypothetical protein; putative exported protein | 2874354     | 2873371 | >           |
| fimbrial adhesin precursor                      | 2875527     | 2874514 | >           |

|                                          |         |         |   |
|------------------------------------------|---------|---------|---|
| outer membrane usher protein precursor   | 2878076 | 2875524 | > |
| P pilus assembly protein, chaperone PapD | 2878869 | 2878138 | > |
| Fimbrial protein                         | 2879489 | 2878956 | > |
| ISAbal                                   | 2880673 | 2881852 | > |

Note that identical composite transposon is present in *Acinetobacter lwoffii* strain FDAARGOS\_552 (plasmid unnamed 1)

11) Strain EK30A

Size of composite transposon: 8022 bp.

| Description                         | Coordinates |         | Orientation |
|-------------------------------------|-------------|---------|-------------|
|                                     | start       | stop    |             |
| ISAlw9                              | 2899792     | 2901184 | <           |
| hypothetical protein                | 2901547     | 2901206 | <           |
| hypothetical protein                | 2902755     | 2902012 | <           |
| hypothetical protein                | 2902928     | 2902755 | <           |
| hypothetical protein                | 2903360     | 2902938 | <           |
| Phage protein                       | 2903823     | 2903335 | <           |
| Transglycosylase-associated protein | 2904288     | 2903824 | <           |
| hypothetical protein                | 2904568     | 2904359 | <           |
| hypothetical protein                | 2905277     | 2904636 | <           |
| hypothetical protein                | 2905674     | 2905237 | <           |
| hypothetical protein                | 2906180     | 2906067 | <           |
| hypothetical protein                | 2906678     | 2906824 | >           |
| hypothetical protein                | 2907310     | 2907128 | <           |
| ISAlw9                              | 2907783     | 2909172 | <           |

12) Strain EK30A

Size of composite transposon: 5481 bp.

| Description                | Coordinates |         | Orientation |
|----------------------------|-------------|---------|-------------|
|                            | start       | stop    |             |
| ISAbal25                   | 2481090     | 2482174 | >           |
| IcmF-related protein       | 2484010     | 2482352 | <           |
| Esterase ybfF (EC 3.1.-.-) | 2484883     | 2484122 | <           |
| ISAbal25                   | 2485484     | 2486570 | >           |
