# Supplementary material for: Genome Analysis of Acinetobacter lwoffii Strains Isolated from Permafrost Soils Aged from 15 Thousand to 1.8 Million Years Revealed Their Close Relationships with Present-Day Environmental and Clinical Isolates
Source: MDPI journal article supplement (doi:10.3390/biology10090871), 2021-09-04
Supplement: s1 [file s1]

**Supplementary Table S7.** Resistance genes on plasmids and chromosomes of contemporary strains of *A. lwoffii*

| Strain           | Source                        | Chromosome<br>GenBank Acc. No.<br>(resistance genes*) | Plasmids**<br>(GenBank Acc.<br>No.)           | Resistance genes<br>(plasmid) |
|------------------|-------------------------------|-------------------------------------------------------|-----------------------------------------------|-------------------------------|
| 12CE1            | Prawn                         | CP059081.1<br>( <i>tel, cop, ars, ohr</i> )           | <b>pR4WN_12CE1</b><br>(MT742180)              | <i>sul, aadA, qacE</i>        |
| FDAARGOS_55<br>1 | Homo<br>sapiens<br>(clinical) | CP054822.1<br>( <i>tel, cop, ars, ohr</i> )           | <b>Unnamed1</b><br>(CP054821.1)               | <i>ars, cop, ohr***</i>       |
|                  |                               |                                                       | Unnamed2<br>(CP054824.1)                      |                               |
|                  |                               |                                                       | Unnamed3<br>(CP054823.1)                      |                               |
|                  |                               |                                                       | Unnamed4<br>(CP054825.1)                      | <i>chr</i>                    |
|                  |                               |                                                       | Unnamed5<br>(CP054826.1)                      |                               |
| FDAARGOS_55<br>2 | Homo<br>sapiens<br>(clinical) | CP046296.1                                            | <b>Unnamed1</b><br>(CP046295.1)               | <i>czc, ars, cop</i>          |
|                  |                               |                                                       | Unnamed2<br>(CP046297.1)                      |                               |
|                  |                               |                                                       | Unnamed3<br>(CP046298.1)                      |                               |
|                  |                               |                                                       | Unnamed4<br>(CP046299.1)                      |                               |
| FDAARGOS_55<br>7 | Homo<br>sapiens<br>(clinical) | CP054803.1<br>( <i>tel, cop, ars, ohr</i> )           | Unnamed1<br>(NZ_CP054806.1)                   |                               |
|                  |                               |                                                       | Unnamed2<br>(CP054805.1)                      |                               |
|                  |                               |                                                       | <b>Unnamed3</b><br>(CP054804.1)               | <i>ars, cop, ohr</i>          |
| FDAARGOS_<br>620 | Homo<br>sapiens<br>(clinical) | NZ_JAAXYZ0100000<br>03.1 ( <i>cop, ars, ohr</i> )     | <b>Unnamed1</b><br>(NZ_JAAXYZ010<br>000001.1) | <i>ars, cop, ohr, czc</i>     |
|                  |                               |                                                       | Unnamed2<br>(NZ_JAAXYZ010<br>000002)          | <i>chr</i>                    |
|                  |                               |                                                       | Unnamed2<br>(NZ_JAAXYZ010<br>000005.1)        |                               |
| M2a              | Honey                         | -                                                     | <b>pAVAc14</b><br>(MK978162.1)                |                               |
|                  |                               |                                                       | pAVAc184<br>(MK944320.1)                      |                               |
|                  |                               |                                                       | pAVAc194<br>(MK978163.1)                      |                               |
|                  |                               |                                                       | pAVAc198<br>(MK993303.1)                      | <i>cop</i>                    |

|                  |                 |                                             |                                 |                      |
|------------------|-----------------|---------------------------------------------|---------------------------------|----------------------|
|                  |                 |                                             | pAVAc115<br>(MK993300.1)        |                      |
|                  |                 |                                             | pAVAc116<br>(MK978161.1)        |                      |
|                  |                 |                                             | pAVAc117<br>(MK978159.1)        |                      |
|                  |                 |                                             | pAVAc119<br>(MK978160.1)        |                      |
|                  |                 |                                             | pAVAc127<br>(MK993301.1)        |                      |
|                  |                 |                                             | pAVAc130<br>(MK944319.1)        |                      |
|                  |                 |                                             | pAVAc144<br>(MK944317.1)        |                      |
|                  |                 |                                             | pAVAc145<br>(MK944318.1)        |                      |
|                  |                 |                                             | pAVAc147<br>(MK944321.1)        |                      |
|                  |                 |                                             | pAVAc167<br>(MK993302.1)        |                      |
|                  |                 |                                             | pAVAc176<br>(MK944322.1)        |                      |
| FDAARGOS<br>1393 | missing<br>info | CP077336.1<br>( <i>tel, cop, ars, ohr</i> ) | <b>Unnamed1</b><br>(CP077337.1) |                      |
|                  |                 |                                             | <b>Unnamed2</b><br>(CP077338.1) | <i>ars, cop</i>      |
|                  |                 |                                             | <b>Unnamed3</b><br>(CP077339.1) | <i>chr, ars, mer</i> |
|                  |                 |                                             | Unnamed4<br>(CP077340.1)        |                      |
|                  |                 |                                             | Unnamed5<br>(CP077341.1)        |                      |
| FDAARGOS<br>1394 | missing<br>info | CP077369.1<br>( <i>tel, cop, ars, ohr</i> ) | <b>Unnamed1</b><br>(CP077370.1) | <i>cop</i>           |
|                  |                 |                                             | <b>Unnamed2</b><br>(CP077371.1) |                      |
|                  |                 |                                             | Unnamed3<br>(CP077372.1)        |                      |
|                  |                 |                                             | Unnamed4<br>(CP077373.1)        |                      |
|                  |                 |                                             | Unnamed5<br>(CP077374.1)        |                      |
|                  |                 |                                             | Unnamed6<br>(CP077375.1)        |                      |
|                  |                 |                                             | Unnamed7<br>(CP077376.1)        |                      |
|                  |                 |                                             | Unnamed8<br>(CP077377)          |                      |
| ZS207            | Gold<br>mine    | CP019143.2                                  | <b>pmZS</b><br>(CP019144)       | <i>ars</i>           |
|                  |                 |                                             | pZS-1                           |                      |

|         |                            |               |                                     |                                                         |
|---------|----------------------------|---------------|-------------------------------------|---------------------------------------------------------|
|         |                            |               | (CP043941)                          |                                                         |
|         |                            |               | pZS-2<br>(CP019152)                 |                                                         |
|         |                            |               | pZS-3<br>(CP019145)                 |                                                         |
|         |                            |               | pZS-4<br>(CP019147)                 |                                                         |
|         |                            |               | pZS-5<br>(CP019146)                 |                                                         |
|         |                            |               | pZS-6<br>(CP019151)                 |                                                         |
|         |                            |               | pZS-7<br>(CP019148)                 |                                                         |
|         |                            |               | pZS-8<br>(CP019149)                 |                                                         |
|         |                            |               | pZS-9<br>(CP019150)                 |                                                         |
|         |                            |               | pZS-11<br>(NZ_CP019150)             |                                                         |
|         |                            |               | pZS-13<br>(NZ_CP019151)             |                                                         |
|         |                            |               | pZS-20<br>(NZ_CP019152)             |                                                         |
| SU1904  | Bile                       | -             | <b>pSU1904NDM.1</b><br>(LC537594.1) | <i>aphA6</i> , <i>bla</i> <sub>NDM-1</sub>              |
| WJ10621 | Homo sapiens<br>(clinical) | NZ_CM001194.1 | <b>pNDM-BJ01</b><br>(JQ001791.1)    | <i>bla</i> <sub>NDM-1</sub> , <i>aphA6</i> , <i>ble</i> |
| WJ10659 | Homo sapiens<br>(clinical) | -             | <b>pNDM-BJ02</b><br>(JQ060896.1)    | <i>bla</i> <sub>NDM-1</sub> , <i>aphA6</i> , <i>ble</i> |
| Iz4b    | Homo sapiens               | -             | <b>pNDM-Iz4b</b><br>(NC_025000.1)   | <i>bla</i> <sub>NDM-1</sub> , <i>aphA6</i> , <i>ble</i> |
| JN49-1  | Homo sapiens<br>(feces)    | -             | <b>pNDM-JN01</b><br>(KM210086.1)    | <i>bla</i> <sub>NDM-1</sub> , <i>aphA6</i> , <i>ble</i> |
| SGC-HZ9 | Chicken<br>(cloacal swab)  |               | pAL-01<br>(JN616388)                | <i>bla</i> <sub>NDM-1</sub> , <i>aphA6</i>              |
| ABZ78   | Clinical isolate           | -             | pABZ78<br>(JQ739158)                | <i>ble</i>                                              |

\* resistance genes in addition to the genes *cat*, *bla*<sub>OXA-134</sub>, *macAB* present in the chromosomes of all the studied strains

\*\* plasmids larger than 40 kb are highlighted in bold

Resistance genes: *ohr* – resistance to organic hydroperoxides, *tel* – to tellurium, *aphA6*- to amikacin, *ble* – to bleomycin, *aadA* – to streptomycin / spectinomycin, *qacE* – to quaternary ammonium compounds, *sul* – to sulfonamide, *nreB* – to Ni, *bla*<sub>NDM-1</sub> – broad-spectrum beta-lactamases., *czc* – to Co/Zn/Cd, *cop* – to Cu, *chr* – to Cr, *ars* – to As; *mer* – mercury resistance operon.
